# Supplementary material for: Balancing the Supply Chain Information Systems (SSIS) and Organisational Performance
Source: Royal Society of Chemistry journal article supplement (doi:10.1039/c9an01005j), 2014-01-01
Supplement: c9an01005j1.pdf [file c9an01005j1.pdf]

## Reliable, high-quality suppression of NMR signals arising from water and macromolecules: application to bio-fluid analysis

Juan A. Aguilar,<sup>1\*</sup> Julia Cassani,<sup>1,2</sup> Fay Probert,<sup>3</sup> Jacqueline Palace,<sup>4</sup> Tim D. W. Claridge,<sup>5</sup> Adolfo Botana<sup>6</sup> and Alan M. Kenwright<sup>1</sup>

<sup>1</sup> Department of Chemistry, Durham University, South Road, Durham, DH1 3LE (UK).

<sup>2</sup> Departamento de Sistemas Biológicos, Universidad Autónoma Metropolitana Unidad, Xochimilco Col. Villa Quietud, CP 04960, D.F. (México).

<sup>3</sup> Department of Pharmacology, University of Oxford, Mansfield Road, Oxford, OX1 3QT (UK).

<sup>4</sup> Nuffield Department of Clinical Neurosciences, John Radcliffe Hospital, University of Oxford, Level 3, West Wing, Head-ley Way, Oxford, OX3 9DU (UK).

<sup>5</sup> Department of Chemistry, University of Oxford, Chemistry Research Laboratory, Mansfield Road, Oxford, OX1 3TA (UK).

<sup>6</sup> JEOL House, Silvert Court, Watchmead Welwyn Garden City, Herts AL7 1LT (UK).

This supplementary information section contains:

- The Robust-5 code for Varian/Agilent, Bruker and Jeol spectrometers.
- The Wasted-I and II code for Varian/Agilent, Bruker and Jeol spectrometers.

## Robust-5 code for Varian/Agilent spectrometers

`/* There is no warranty (implied or explicit) that it is optimal or bug-free. Anyone using this code does so at their own risk.*/`

`/* Robust-5 for Varian/Agilent spectrometers START: remove this line */`

```
#ifndef LINT
static char SCCSid[] = "@(#)Robust5";
#endif
```

```
/* J. A. Aguilar. Durham University (UK). 20/12/2012.
   j.a.aguilar@durham.ac.uk
```

This code is provided as a record of the pulse programmes used to obtain the spectra reported in this publication. There is no warranty implied or explicit) that it is optimal or bug-free. Anyone using this code does so at their own risk.

```
gt2 - gradient duration (1 ms)
gzlvl1 - gradient power for the 1st solvent suppression echo
gzlvl2 - gradient power for the 2nd solvent suppression echo
A good gzlvl1/gzlvl2= 5.8. See below.
gstab - gradient stabilization delay (1 ms)
pe - flag for perfect echo pulse. Default='y'
d3 - delay in WATERGATE. Position of the secondary notches=1/d3 Hz from the centre of the spectrum.
alt_grd. Flag to alternate the pulsed field gradients every other scan. Default='y'. This seems to improve the suppression slightly. To determine whether your spectrometer benefits from this option, just run alt_grd='y','n', 'y','n'
```

Typical conditions as used in the manuscript:

The phase cycle requires 32 scans and that is what we recommend, but often, a minimum of 8 produces good results. Always set the number of scans to a multiple of two.

It is important, if very high levels of suppression are sought, to optimize the duration and strength of the pulsed field gradients, as well as its ratio. We have found that a ratio of 5.8 between the first and the second gradient pairs produces excellent results when 1 ms long pulses of 28.3 G cm<sup>-1</sup> (first pair) are used. The optimum gradient stabilization delay varies among probes but 0.5 to 1 ms delays are often adequate. It was found that in order to minimize signal distortions the pre-focusing gradient pulses and the first radio-frequency pulse should be separated by, at least, 1.5 ms, although this may vary among probes. Finally, alternating the polarity of the gradient pulses every other scan seems to slightly improve results. Again, the latter is probably probe dependent.

Because the W5 elements produces extra notches separated by 1/d3 Hz, the W5 inter-pulse delay (d3) was set to 240  $\mu$ s when using the 600 MHz spectrometer, and to 287 when using the 700 MHz one.

`*/`

```
#include <standard.h>
pulsesequence()
{
static int    ph1[2]   = {0,2},
              ph2[32]  = {0,0,0,0,0,0,0,0,1,1,1,1,1,1,1,2,2,2,2,2,2,2,2,3,3,3,3,3,3,3},
              ph3[32]  = {2,2,2,2,2,2,2,2,3,3,3,3,3,3,3,0,0,0,0,0,0,0,0,1,1,1,1,1,1,1},
              ph4[1]   = {1},
              ph5[8]   = {0,0,1,1,2,2,3,3},
              ph6[8]   = {2,2,3,3,0,0,1,1},
              rec[16]  = {0,2,2,0,0,2,2,0,2,0,0,2,2,0,0,2},
              ph9[2]   = {0,1};

double  gstab = getval("gstab"),
        gzlvl1 = getval("gzlvl1"),
        gt2 = getval("gt2"),
        gzlvl2 = getval("gzlvl2"),
        d3 = getval("d3"),
        mult=getval("mult"),
        ddrtc = getval("ddrtc");
```

```

char    sspul[MAXSTR],
        pe[MAXSTR],
        alt_grd[MAXSTR];

rofl = getval("rofl"); if(rofl > 2.0e-6) rofl = 2.0e-6;
getstr("pe",pe);
getstr("sspul",sspul);
getstr("lockcomp",lockcomp);
getstr("alt_grd",alt_grd);

settable(t1,2,ph1);
settable(t2,32,ph2);
settable(t3,32,ph3);
settable(t4,1,ph4);
settable(t5,8,ph5);
settable(t6,8,ph6);
settable(t7,16,rec);
mod2(ct,v9);

status(A);

delay(rofl);

    delay(d1-gt2*4.0-gstab*2.0);
    obspower(tpwr);
    obsoffset(tof);

if (alt_grd[0] == 'y')
{
ifzero(v9); rgradient('z',gzlv11);
elsenz(v9); rgradient('z',-1.0*gzlv11);
endif(v9);
}
else rgradient('z',gzlv11);
    delay(2.0*gt2);

if (alt_grd[0] == 'y')
{
ifzero(v9); rgradient('z',gzlv12);
elsenz(v9); rgradient('z',-1.0*gzlv12);
endif(v9);
}
else rgradient('z',gzlv12);
    delay(2.0*gt2);
    rgradient('z',0);
    delay(1.5e-3);

status(B);

    rgpulse(pw, t1, rofl, rofl);          /* 90d initial excitation pulse */

if (alt_grd[0] == 'y')
{
ifzero(v9); zgradpulse(-1.0*gzlv11,gt2);
elsenz(v9); zgradpulse(gzlv11,gt2);
endif(v9);
}
else zgradpulse(-1.0*gzlv11,gt2);

/* First WATERGATE */
    delay(gstab-rofl-rofl);
    rgpulse(pw*0.087,t2,rofl,rofl);
    delay(d3-rofl-rofl-2*(pw*0.087 + pw*0.206)/3.1416);
    rgpulse(pw*0.206,t2,rofl,rofl);
    delay(d3-rofl-rofl-2*(pw*0.206 + pw*0.413)/3.1416);
    rgpulse(pw*0.413,t2,rofl,rofl);
    delay(d3-rofl-rofl-2*(pw*0.413 + pw*0.778)/3.1416);
    rgpulse(pw*0.778,t2,rofl,rofl);
    delay(d3-rofl-rofl-2*(pw*0.778 + pw*1.491)/3.1416);
    rgpulse(pw*1.491,t2,rofl,rofl);
    delay(d3-rofl-rofl-2*(pw*1.491 + pw*1.491)/3.1416);
    rgpulse(pw*1.491,t3,rofl,rofl);
    delay(d3-rofl-rofl-2*(pw*1.491 + pw*0.778)/3.1416);
    rgpulse(pw*0.778,t3,rofl,rofl);
    delay(d3-rofl-rofl-2*(pw*0.778 + pw*0.413)/3.1416);
    rgpulse(pw*0.413,t3,rofl,rofl);

```

```

        delay(d3-rof1-rof1-2*(pw*0.413 + pw*0.206)/3.1416);
        rgpulse(pw*0.206,t3,rof1,rof1);
        delay(d3-rof1-rof1-2*(pw*0.206 + pw*0.087)/3.1416);
        rgpulse(pw*0.087,t3,rof1,rof1);

if (alt_grd[0] == 'y')
{
ifzero(v9); zgradpulse(-1.0*gzlv11,gt2);
elsenz(v9); zgradpulse(gzlv11,gt2);
endif(v9);
}
else zgradpulse(-1.0*gzlv11,gt2);
        delay(gstab-rof1);

if (pe[A] == 'y')                                /* Use perfect echo pulse */
{
        rgpulse(pw,t4,rof1,rof1);                /* 90d refocusing pulse */
}

if (alt_grd[0] == 'y')
{
ifzero(v9); zgradpulse(-1.0*gzlv12,gt2);
elsenz(v9); zgradpulse(gzlv12,gt2);
endif(v9);
}
else zgradpulse(-1.0*gzlv12,gt2);

                                                /* Second WATERGATE */
        delay(gstab-rof1-rof1);
        rgpulse(pw*0.087,t5,rof1,rof1);
        delay(d3-rof1-rof1-2*(pw*0.087 + pw*0.206)/3.1416);
        rgpulse(pw*0.206,t5,rof1,rof1);
        delay(d3-rof1-rof1-2*(pw*0.206 + pw*0.413)/3.1416);
        rgpulse(pw*0.413,t5,rof1,rof1);
        delay(d3-rof1-rof1-2*(pw*0.413 + pw*0.778)/3.1416);
        rgpulse(pw*0.778,t5,rof1,rof1);
        delay(d3-rof1-rof1-2*(pw*0.778 + pw*1.491)/3.1416);
        rgpulse(pw*1.491,t5,rof1,rof1);
        delay(d3-rof1-rof1-2*(pw*1.491 + pw*1.491)/3.1416);
        rgpulse(pw*1.491,t6,rof1,rof1);
        delay(d3-rof1-rof1-2*(pw*1.491 + pw*0.778)/3.1416);
        rgpulse(pw*0.778,t6,rof1,rof1);
        delay(d3-rof1-rof1-2*(pw*0.778 + pw*0.413)/3.1416);
        rgpulse(pw*0.413,t6,rof1,rof1);
        delay(d3-rof1-rof1-2*(pw*0.413 + pw*0.206)/3.1416);
        rgpulse(pw*0.206,t6,rof1,rof1);
        delay(d3-rof1-rof1-2*(pw*0.206 + pw*0.087)/3.1416);
        rgpulse(pw*0.087,t6,rof1,rof2);

if (alt_grd[0] == 'y')
{
ifzero(v9); zgradpulse(-1.0*gzlv12,gt2);
elsenz(v9); zgradpulse(gzlv12,gt2);
endif(v9);
}
else zgradpulse(-1.0*gzlv12,gt2);
        delay(gstab-rof2+ddrtc);

setreceiver(t7);
status(C);
}

/* Robust-5 for Varian/Agilent spectrometers END: remove this line */

```

## Robust-5 code for Bruker spectrometers

/\* There is no warranty (implied or explicit) that it is optimal or bug-free. Anyone using this code does so at their own risk.\*/

/\* Robust-5 for Bruker spectrometers START: remove this line \*/

```
;Robust5.pp
;avance-version (20/12/2012)

;Robust NMR water signal suppression for demanding analytical applications
;Juan A. Aguilar and Simon. J. Kenwright
;Analyst, 141, pp236-242 (2016)
;doi: 10.1039/c5an02121a

;Excitation scilpting W5 reference:
;M. Liu, X. Mao, C. He, H. Huang, J.K. Nicholson & J.C. Lindon,
;J. Magn. Reson. 132, 125 - 129 (1998)

;Using the W5 time correction of :
;Wang et al J. Magn. Reson. 206, 205 - 209 (2010)

;$CLASS=HighRes
;$DIM=1D
;$TYPE=
;$SUBTYPE=
;$COMMENT=

#include <Avance.incl>
#include <Grad.incl>
"p20=p16*2"
"d19= (1/(2*cnst10))"
"p27=p1"

"d20=(d19*2) - (2*(p27*0.087 + p27*0.206)/3.1416) "
"d21=(d19*2) - (2*(p27*0.413 + p27*0.206)/3.1416) "
"d22=(d19*2) - (2*(p27*0.413 + p27*0.778)/3.1416) "
"d23=(d19*2) - (2*(p27*0.778 + p27*1.491)/3.1416) "
"d24=(d19*2) - (2*(p27*1.491 + p27*1.491)/3.1416) "
"d25=(d19*2) - (2*(p27*0.778 + p27*1.491)/3.1416) "
"d26=(d19*2) - (2*(p27*0.413 + p27*0.778)/3.1416) "
"d27=(d19*2) - (2*(p27*0.413 + p27*0.206)/3.1416) "
"d28=(d19*2) - (2*(p27*0.087 + p27*0.206)/3.1416) "
"acqt0=-4u"

1 ze
2 30m
  d1
  50u UNBLKGRAD
  p20:gp3*EA
  d16
  d16
  p20:gp4*EA
  d16
  d16
  10u p11:f1

p1 ph1

p16:gp1*EA
d16 p118:f1
p27*0.087 ph3
d20
p27*0.206 ph3
d21
p27*0.413 ph3
```

```

d22
p27*0.778 ph3
d23
p27*1.491 ph3
d24
p27*1.491 ph4
d25
p27*0.778 ph4
d26
p27*0.413 ph4
d27
p27*0.206 ph4
d28
p27*0.087 ph4
p16:gp1*EA
d16
p1 ph2

p16:gp2*EA
d16
p27*0.087 ph5
d20
p27*0.206 ph5
d21
p27*0.413 ph5
d22
p27*0.778 ph5
d23
p27*1.491 ph5
d24
p27*1.491 ph6
d25
p27*0.778 ph6
d26
p27*0.413 ph6
d27
p27*0.206 ph6
d28
p27*0.087 ph6
p16:gp2*EA
d16 igrad EA

4u BLKGRAD
go=2 ph31
30m mc #0 to 2 F0(zd)
exit

ph1=0 2
ph2=1
ph3=0 0 0 0 0 0 0 1 1 1 1 1 1 1 2 2 2 2 2 2 2 2 3 3 3 3 3 3 3 3
ph4=2 2 2 2 2 2 2 3 3 3 3 3 3 3 0 0 0 0 0 0 0 0 1 1 1 1 1 1 1 1
ph5=0 0 1 1 2 2 3 3
ph6=2 2 3 3 0 0 1 1
ph31=0 2 2 0 0 2 2 0 2 0 0 2 2 0 0 2

;p11 : f1 channel - power level for pulse (default)
;p1 : f1 channel - 90 degree high power pulse
;p16: homospoil/gradient pulse. 1 ms
;d1 : relaxation delay; 1-5 * T1
;d16: delay for homospoil/gradient recovery. 1 ms
;d19: delay for W5 binomial water suppression
;d19 = (1/(2*d)), d = distance of next null (in Hz). Calculated using cnst10.
;cnst10: distance to null in Hz for W5 binomial water suppression
; The further apart the notches, they wider they become
;ns: 8 * n, total number of scans: NS * TD0
;ds: 4; Newer use an odd number of scans or the residual signals will be huge.
;DO NOT SPIN THE SAMPLE

;use gradient ratio: gp 1 : gp 2 : gp 3 : gp 4
; 62 : 10.68 : -62 : -10.68
;for z-only gradients:
;gpz1: 53%
;gpz2: 9.14%
;gpz1: -53%
;gpz2: -9.14%

```

```
;use gradient files:  
;gpnam1: SMSQ10.100  
;gpnam2: SMSQ10.100  
;gpnam3: SMSQ10.100  
;gpnam4: SMSQ10.100
```

```
;$Id: Robust5.pp,v 1.10 20/12/2012. 17:49:32 ber Exp $
```

```
/* Robust-5 for Bruker spectrometers END: remove this line */
```

## Robust-5 code for Jeol spectrometers

/\* There is no warranty (implied or explicit) that it is optimal or bug-free. Anyone using this code does so at their own risk.\*/

/\* Robust-5 for Jeol spectrometers START: remove this line \*/

```
-----
--                                     --
--                               Experiment Source Code                               --
--                   Delta NMR Experiment & Machine Control Interface                   --
--                                     --
--                                     --
--                                     --
-----
-- HELP.eng: Robust-5
-- Category: 1D, water_suppression, liquids
-- File name : Robust5
--
-- Sequence name : Robust-5
--
-- Reference
-- Robust NMR water signal suppression for demanding analytical applications
-- Juan A. Aguilar and Simon. J. Kenwright
-- Analyst, 2016,141, 236-242
-- doi: 10.1039/c5an02121a
--
-- Parameters
-- x_pulse           : 90[deg] pulse width
-- x_atn             : attenuator of x_pulse
--
--
-- relaxation_delay  : inter-pulse delay
-- repetition_time   : pulse repetition_time (= relaxation_delay+x_acq_time)
--
-- irr/tri decoupling parameters
--
-- irr_domain        : nucleus of irr presaturation or homo_decoupling
-- irr_offset         : offset of irr presaturation or homo_decoupling
-- irr_attenuator    : attenuator of irr presaturation or homo_decoupling
--
-- tri_domain        : nucleus of tri presaturation or homo_decoupling
-- tri_offset        : offset of tri presaturation or homo_decoupling
-- tri_attenuator    : attenuator of tri presaturation or homo_decoupling
--
-- delta             : diffusion-encoding gradient pulse width
-- g                 : diffusion-encoding gradient pulse amplitude
-- grad_1            : pulse width of PFG1
-- grad_1_amp        : z-axis amplitude of PFG1
-- grad_shape_type   : shape of PFG pulse
-- grad_recover      : gradient recovery time
--
--
--
-- END HELP

header
  filename => "Robust5";
  sample_id => "";
  comment  => "Robust-5 NMR pulse sequence for solvent suppression";
  process  = "proton.list";
  include "header";
end header;

instrument
  include "instrument";
  spin_state => "SPIN OFF";
end instrument;

acquisition
  x_domain      => "Proton";
  x_offset      => 4.68[ppm];
  x_sweep       => 12[ppm];
```



```

x_points      => 16384;
scans         => 32;
x_prescans   => 4;
mod_return    => 1;
include "acquisition";
end acquisition;

pulse
  include "watergate_hard";

  collect COMPLEX,OBS;

comment_1 =? "*** Pulse ***";
x_pulse => x90, help "observe 90[deg] pulse";
x_atn   =? xatn, help "attenuator for x_pulse";

grad_1   =? 1.0[ms], help "duration of grad_1";
grad_2   =? 1.0[ms], help "duration of grad_2";
gradient_max => z_gradient_max, help "Maximum amplitude for a given probe as defined in
the probe file";
Note     =? "Do not exceed gradient_max value for grad_1_amp";

grad_1_amp => 250[mT/m], help "Amplitude first gradient pair in Tesla/meter units";
grad_2_amp => 60[mT/m], help "Amplitude second gradient pair in Tesla/meter units";
grad_shape => "SQUARE",("SQUARE","SINE"), help "shape of grad_1";
grad_recover => 1[ms], help "gradient recovery time";

comment_312 =? "*** Watergate hard solvent suppression ***";
--watergate parameters
wgh_x_pulse => x90, help "90[deg] pulse used for watergate composite pulse";
include "services";
xfreq      =? _get_freq( x_domain );
wgh_null   => 4000[Hz], help "null frequency";
wgh_null_ppm =? (wgh_null/xfreq)*1000000[ppm];
wgh_tau    =? 1/wgh_null, help "watergate pulse interval 1/wgh_null";

comment_7 =? "*** Pulse Delay ***";
initial_wait = 1.0[s];
relaxation_delay => 1.0[s], help "inter-pulse delay";

include "pulse";

phase_1 = {0,180};
phase_2 = {90};
phase_wgh1 = {8(0), 8(90), 8(180), 8(270)};
phase_wgh2 = {2(0), 2(90), 2(180), 2(270)};
phase_acq = {0,180,180,0,0,180,180,0,180,0,0,180,180,0,0,180};

begin
  initial_wait;
  relaxation_delay;
  -- Lock prefocussing
  grad_2, (fgz.gate, fgz.shape.grad_shape, -fgz.amp.grad_1_amp);
  grad_recover;
  grad_2, (fgz.gate, fgz.shape.grad_shape, -fgz.amp.grad_1_amp);
  grad_recover;
  grad_2, (fgz.gate, fgz.shape.grad_shape, -fgz.amp.grad_2_amp);
  grad_recover;
  grad_2, (fgz.gate, fgz.shape.grad_shape, -fgz.amp.grad_2_amp);
  grad_recover;
  grad_recover;
  grad_recover;
  grad_recover;

  -- Perfect echo
  x_pulse, (obs.gate, obs.phs.phase_1, obs.atn.x_atn);
  grad_1, (fgz.gate, fgz.shape.grad_shape, fgz.amp.grad_1_amp);
  grad_recover;

  wgh5_comp180(wgh_x_pulse, phase_wgh1, x_atn, wgh_tau);

  grad_1, (fgz.gate, fgz.shape.grad_shape, fgz.amp.grad_1_amp);
  grad_recover;

```

```
x_pulse, (obs.gate, obs.phs.phase_2, obs.atn.x_atn);
grad_2, (fgz.gate, fgz.shape.grad_shape, fgz.amp.grad_2_amp);
grad_recover;

wgh5_comp180(wgh_x_pulse, phase_wgh2, x_atn, wgh_tau);

grad_2, (fgz.gate, fgz.shape.grad_shape, fgz.amp.grad_2_amp);
grad_recover;

acq (dead_time, delay, phase_acq);
end pulse;

/* Robust-5 for Jeol spectrometers END: remove this line */
```

## Wasted-I code for Varian/Agilent spectrometers

/\* There is no warranty (implied or explicit) that it is optimal or bug-free. Anyone using this code does so at their own risk.\*/

/\* Wasted-I for Varian/Agilent spectrometers START: remove this line \*/

```
#ifndef LINT
static char SCCSid[] = "@(#)Wasted_I";
#endif

/* J. A. Aguilar. Durham. 20/12/2012.

    gt1          - gradient duration for the solvent suppression echo
    gzlv11       - gradient power for the solvent suppression echo
    gt2          - gradient duration for the solvent suppression echo
    gzlv12       - gradient power for the solvent suppression echo
    gstab        - gradient stabilization delay
    d3           - determines the location the secondary notches (at 1/d3 Hz from the
centre of the spectrum). The further apart, the wider the notches.
    tof          - transmitter offset (set on resonance for H2O)
    slock        - spinlock (y/n). Default='y'. Helps keeping the water signal small.
    d3           - creates extra notches at a distance delta=1/d3 Hz from the centre of
the window. The further apart the notches, the wider they become
    cycles       - 1 cycle = 2 spin echoes
    cycle_time   - 4 times tau (2 spin echoes, see paper). The duration for the whole
cycle (2 spin echoes) is. Keep cycle_time << 0.25/(2PiJ).
```

Typical conditions as used in the manuscript:

Always set the number of scans to a multiple of two, but the phase cycle requires 32 scans to produce clean results and that is what we recommend.

If very high levels of suppression are sought, it is important to optimize the duration and strength of the pulsed field gradients, as well as their ratios.

We have found that a ratio of 5.8 between the first and the second gradient pairs produces excellent results when 1 ms long pulses of 28.3 G cm<sup>-1</sup> (first pair) are used.

The optimum gradient stabilization delay varies among probes but 0.5 to 1 ms delays are often adequate.

```
-- Reference
-- Robust NMR water signal suppression for demanding analytical applications
-- Juan A. Aguilar and Alan. J. Kenwright
-- Analyst (2016),141, 236-242
-- doi: 10.1039/C5AN02121A
```

```
-- Spin echo NMR spectra without J modulation
-- A Aguilar, Juan & Nilsson, Mathias & Bodenhausen, Geoffrey & A Morris, Gareth.
-- Chemical communications (2011), 48, 811-3. DOI: 10.1039/clcc16699a.
```

```
*/
```

```
#include <standard.h>
pulsesequence()
{
static int    ph1[2]   = {0,2},
              ph2[32] = {0,0,0,0,0,0,0,0,1,1,1,1,1,1,1,2,2,2,2,2,2,2,2,2,3,3,3,3,3,3,3},
              ph3[32] = {2,2,2,2,2,2,2,2,3,3,3,3,3,3,3,0,0,0,0,0,0,0,0,0,1,1,1,1,1,1,1,1},
              ph4[1]   = {1},
              ph5[8]   = {0,0,1,1,2,2,3,3},
              ph6[8]   = {2,2,3,3,0,0,1,1},
              rec[16]  = {0,2,2,0,0,2,2,0,2,0,2,0,2,0,2,0,2};

double  gstab = getval("gstab"),
        gt1   = getval("gt1"),
        gt2   = getval("gt2"),
        gzlv11 = getval("gzlv11"),
        gzlv12 = getval("gzlv12"),
        gzlv13 = getval("gzlv13"),
```

```

        d3 = getval("d3"),      /* Creates extra notches at a distance delta=1/d3 Hz
from the center of the window. The further apart the notches, the wider they become */

        atfrq = getval("satfrq"),
        cycles = getval("cycles"),      /* 1 cycle = 2 spin echoes */
        cycle_time = getval("cycle_time"), /* cycle_time (4 time tau) = time duration
for the whole cycle (2 spin echoes). << 0.25/(2PiJ). Usually 4 ms, but up to 20 ms can be used
sometimes */
        ddrtc = getval("ddrtc");

char    sspul[MAXSTR],
        wg[MAXSTR],
        pe[MAXSTR],
        slock[MAXSTR];

rofl = getval("rofl"); if(rofl > 2.0e-6) rofl = 2.0e-6;
getstr("wg",wg);
getstr("pe",pe);
getstr("sspul",sspul);
getstr("slock",slock);

settable(t1,2,ph1);
settable(t2,32,ph2);
settable(t3,32,ph3);
settable(t4,1,ph4);
settable(t5,8,ph5);
settable(t6,8,ph6);
settable(t7,16,rec);

cycles=cycles-2;
initval(cycles,v5);

status(A);

delay(rofl);

    if (satmode[0] == 'y')      /* This option has not been tested */
    {
        if (d1 - satdly > 0)
            delay(d1 - satdly);
        else
            delay(0.02);
        obspower(satpwr);
        if (satfrq != tof)
            obsoffset(satfrq);
        rgpulse(satdly,zero,rofl,rofl);
        if (satfrq != tof)
            obsoffset(tof);
        obspower(tpwr);
        delay(1.0e-5);
    }
    else
    { delay(d1); }

    if (getflag("wet"))      /* This option has not been tested */
        wet4(zero,one);

status(B);

        rgpulse(pw, t1, rofl, rofl);      /* 90d
initial excitation pulse */

/* ***** 1st cycle START ***** */

        delay(cycle_time*0.25-rofl-rofl);
        rgpulse(pw*2.0,zero,rofl,rofl);      /* 180d */
        delay(cycle_time*0.25-rofl-rofl);

        rgpulse(pw,t4,rofl,rofl);      /* 90d refocusing pulse */

        delay(cycle_time*0.25-rofl-rofl);
        rgpulse(pw*2.0,zero,rofl,rofl);      /* 180d */
        delay(cycle_time*0.25-rofl-rofl);

/* ***** 1st cycle END ***** */

```

```

/* ***** Core cycles START ***** */
starthardloop(v5);

    delay(cycle_time*0.25-rof1);
    rgpulse(pw*2.0,zero,rof1,rof1);          /* 180d */
    delay(cycle_time*0.25-rof1-rof1);

        rgpulse(pw,t4,rof1,rof1);          /* 90d refocusing pulse */

    delay(cycle_time*0.25-rof1-rof1);
    rgpulse(pw*2.0,zero,rof1,rof1);          /* 180d */
    delay(cycle_time*0.25-rof1);

endhardloop();

/* ***** Core cycles END ***** */
/* ***** Last cycle START ***** */

    delay(cycle_time*0.25-rof1);
    rgpulse(pw*2.0,zero,rof1,rof1);          /* 180d */
    delay(cycle_time*0.25-rof1-rof1);

        rgpulse(pw,t4,rof1,rof1);          /* 90d refocusing pulse */

    delay(cycle_time*0.25-rof1-rof1);
    rgpulse(pw*2.0,zero,rof1,rof1);          /* 180d */
    delay(cycle_time*0.25-rof1);

if (slock[0] == 'y') {
    rgpulse(pw*150,t4,rof1,rof1);          /* Spin-Lock */
}

/* ***** Last cycle END ***** */
/* ***** WATERGATE ***** */

    zgradpulse(gzlvl1,gt1);
    delay(gstab-rof1-rof1);

                                                /* First WATERGATE */
    rgpulse(pw*0.087,t2,rof1,rof1);
    delay(d3-rof1-rof1-2*(pw*0.087 + pw*0.206)/3.1416);
    rgpulse(pw*0.206,t2,rof1,rof1);
    delay(d3-rof1-rof1-2*(pw*0.206 + pw*0.413)/3.1416);
    rgpulse(pw*0.413,t2,rof1,rof1);
    delay(d3-rof1-rof1-2*(pw*0.413 + pw*0.778)/3.1416);
    rgpulse(pw*0.778,t2,rof1,rof1);
    delay(d3-rof1-rof1-2*(pw*0.778 + pw*1.491)/3.1416);
    rgpulse(pw*1.491,t2,rof1,rof1);
    delay(d3-rof1-rof1-2*(pw*1.491 + pw*1.491)/3.1416);
    rgpulse(pw*1.491,t3,rof1,rof1);
    delay(d3-rof1-rof1-2*(pw*1.491 + pw*0.778)/3.1416);
    rgpulse(pw*0.778,t3,rof1,rof1);
    delay(d3-rof1-rof1-2*(pw*0.778 + pw*0.413)/3.1416);
    rgpulse(pw*0.413,t3,rof1,rof1);
    delay(d3-rof1-rof1-2*(pw*0.413 + pw*0.206)/3.1416);
    rgpulse(pw*0.206,t3,rof1,rof1);
    delay(d3-rof1-rof1-2*(pw*0.206 + pw*0.087)/3.1416);
    rgpulse(pw*0.087,t3,rof1,rof1);

    zgradpulse(gzlvl1,gt1);
    delay(gstab-rof1);

    rgpulse(pw,t4,rof1,rof1);

    zgradpulse(gzlvl2,gt1);          /* Second WATERGATE */
    delay(gstab-rof1-rof1);

    rgpulse(pw*0.087,t5,rof1,rof1);
    delay(d3-rof1-rof1-2*(pw*0.087 + pw*0.206)/3.1416);
    rgpulse(pw*0.206,t5,rof1,rof1);

```

```

delay(d3-rofl-rofl-2*(pw*0.206 + pw*0.413)/3.1416);
rgpulse(pw*0.413,t5,rofl,rofl);
delay(d3-rofl-rofl-2*(pw*0.413 + pw*0.778)/3.1416);
rgpulse(pw*0.778,t5,rofl,rofl);
delay(d3-rofl-rofl-2*(pw*0.778 + pw*1.491)/3.1416);
rgpulse(pw*1.491,t5,rofl,rofl);
delay(d3-rofl-rofl-2*(pw*1.491 + pw*1.491)/3.1416);
rgpulse(pw*1.491,t6,rofl,rofl);
delay(d3-rofl-rofl-2*(pw*1.491 + pw*0.778)/3.1416);
rgpulse(pw*0.778,t6,rofl,rofl);
delay(d3-rofl-rofl-2*(pw*0.778 + pw*0.413)/3.1416);
rgpulse(pw*0.413,t6,rofl,rofl);
delay(d3-rofl-rofl-2*(pw*0.413 + pw*0.206)/3.1416);
rgpulse(pw*0.206,t6,rofl,rofl);
delay(d3-rofl-rofl-2*(pw*0.206 + pw*0.087)/3.1416);
rgpulse(pw*0.087,t6,rofl,rof2);

zgradpulse(gzlvl2,gt1);
delay(gstab-rof2+ddrtc);

setreceiver(t7);

status(C);

}
/* Wasted-I for Varian/Agilent spectrometers END: remove this line */

```

## Wasted-II code for Varian/Agilent spectrometers

/\* There is no warranty (implied or explicit) that it is optimal or bug-free. Anyone using this code does so at their own risk.\*/

/\* Wasted-II for Varian/Agilent spectrometers START: remove this line \*/

```
#ifndef LINT
static char SCCSid[] = "Painles_II";
#endif

/* J. A. Aguilar. Durham. 20/12/2012.

    gt1          - gradient duration for the solvent suppression echo
    gzlvl1       - gradient power for the solvent suppression echo
    gt2          - gradient duration for the solvent suppression echo
    gzlvl2       - gradient power for the solvent suppression echo
    gstab        - gradient stabilization delay
    d3           - determines the location the secondary notches (at 1/d3 Hz from the
centre of the spectrum). The further apart, the wider the notches.
    tof          - transmitter offset (set on resonance for H2O)
    slock        - 1st spinlock (y/n). Default='y'. Helps keeping the water signal small
    slock_a      - 2nd spinlock (y/n). Default='y'. Eliminates dispersive signals that
could have been produced by COSY-TYPE transfers or by the use of long echo times
    d3           - creates extra notches at a distance delta=1/d3 Hz from the centre of
the window. The further apart the notches, the wider they become
    cycles       - 1 cycle = 2 spin echoes
    cycle_time   - 4 times tau (2 spin echoes, see paper). The duration for the whole
cycle (2 spin echoes) is. Keep cycle_time << 0.25/(2PiJ).
```

Typical conditions as used in the manuscript:

Always set the number of scans to a multiple of two, but the phase cycle requires 32 scans to produce clean results and that is what we recommend.

If very high levels of suppression are sought, it is important to optimize the duration and strength of the pulsed field gradients, as well as their ratios.

We have found that a ratio of 5.8 between the first and the second gradient pairs produces excellent results when 1 ms long pulses of 28.3 G cm<sup>-1</sup> (first pair) are used.

The optimum gradient stabilization delay varies among probes but 0.5 to 1 ms delays are often adequate.

It was found that in order to minimize signal distortions the pre-focusing gradient pulses and the first radio-frequency pulse should be separated by at least 1.5 ms, although this may vary among probes.

Finally, alternating the polarity of the gradient pulses every other scan seems to slightly improve results. Again, the latter is probably probe dependent.

```
-- Reference
-- Robust NMR water signal suppression for demanding analytical applications
-- Juan A. Aguilar and Alan. J. Kenwright
-- Analyst (2016),141, 236-242
-- doi: 10.1039/C5AN02121A

-- Spin echo NMR spectra without J modulation
-- A Aguilar, Juan & Nilsson, Mathias & Bodenhausen, Geoffrey & A Morris, Gareth.
-- Chemical communications (2011), 48, 811-3. DOI: 10.1039/c1cc16699a.
```

\*/

```
#include <standard.h>
```

```
pulsesequence()
{
static int    ph1[2]   = {0,2},
              ph2[32]  = {0,0,0,0,0,0,0,1,1,1,1,1,1,1,1,2,2,2,2,2,2,2,2,3,3,3,3,3,3,3},
              ph3[32]  = {2,2,2,2,2,2,2,2,3,3,3,3,3,3,3,3,0,0,0,0,0,0,0,0,1,1,1,1,1,1,1,1},
              ph4[1]   = {1},
              ph5[8]   = {0,0,1,1,2,2,3,3},
              ph6[8]   = {2,2,3,3,0,0,1,1},
              rec[16]  = {0,2,2,0,0,2,2,0,2,0,2,0,2,0,2,0,2},
              ph9[2]   = {0,1};
```

```

double  gstab = getval("gstab"),
        gt0 = getval("gt0"),
        gt1 = getval("gt1"),
        gt2 = getval("gt2"),
        gzlv10 = getval("gzlv10"),
        gzlv11 = getval("gzlv11"),
        gzlv12 = getval("gzlv12"),
        gzlv13 = getval("gzlv13"),
        d3 = getval("d3"),      /* second notch at delta=1/d3 */
        Dtau, Ddelta, Deltac, dosytimecubed, dosyfrq, del,
        atfrq = getval("satfrq"),
        cycles = getval("cycles"),      /* 1 cycle = 2 spin echoes = 2 diffusion
encoding periods. Keep in mind that each cycle uses 4 gradients, so keep it to a minimum. It
also helps keeping signal. */
        cycle_time = getval("cycle_time"), /* cycle_time= time duration for the whole
cycle (2 spin echoes). 20-30, even 40 ms can be used depending on the actual coupling
constants. Not the whole cycle_time is used for diffusion encoding, as gstabs are used */
        ddrtc = getval("ddrtc"),
        itof = getval("itof");

char    lockcomp[MAXSTR],
        sspul[MAXSTR],
        slock[MAXSTR],
        slock_a[MAXSTR],
        alt_grd[MAXSTR];

rofl = getval("rofl"); if(rofl > 2.0e-6) rofl = 2.0e-6;
getstr("sspul", sspul);
getstr("lockcomp", lockcomp);
getstr("slock", slock);
getstr("slock_a", slock_a);
getstr("alt_grd", alt_grd);

settable(t1, 2, ph1);
settable(t2, 32, ph2);
settable(t3, 32, ph3);
settable(t4, 1, ph4);
settable(t5, 8, ph5);
settable(t6, 8, ph6);
settable(t7, 16, rec);

mod2(ct, v9);

dosyfrq = sfrq;
cycles=cycles-2;
initval(cycles, v5);

status(A);

delay(rofl);

    if (satmode[0] == 'y')      /* This has not been tested */
    {
        if (d1 - satdly > 0)
            delay(d1 - satdly);
        else
            delay(0.02);
        obspower(satpwr);
        obsoffset(satfrq);
        rgpulse(satdly, zero, rofl, rofl);

        delay(1.0e-5);
    }
    else
    {
        delay(d1-gt2*4.0-gstab*2.0);
    }

    obspower(tpwr);
    obsoffset(tof);

if (alt_grd[0] == 'y')
{
ifzero(v9); rgradient('z', gzlv11);
elsenz(v9); rgradient('z', -1.0*gzlv11);
endif(v9);
}

```



```

else rgradient('z',gzlv11);

    delay(2.0*gt2);

if (alt_grd[0] == 'y')
{
ifzero(v9); rgradient('z',gzlv12);
elsenz(v9); rgradient('z',-1.0*gzlv12);
endif(v9);
}
else rgradient('z',gzlv12);

    delay(2.0*gt2);

    rgradient('z',0);
    delay(1.5e-3);

status(B);

    rgpulse(pw, t1, rof1, rof1);          /* 90d initial excitation pulse */

if (alt_grd[0] == 'y')
{
ifzero(v9); zgradpulse(-1.0*gzlv11,gt2);
elsenz(v9); zgradpulse(gzlv11,gt2);
endif(v9);
}
else zgradpulse(-1.0*gzlv11,gt2);

    delay(gstab-rof1-rof1);

    rgpulse(pw*0.087,t2,rof1,rof1);
    delay(d3-rof1-rof1-2*(pw*0.087 + pw*0.206)/3.1416);
    rgpulse(pw*0.206,t2,rof1,rof1);
    delay(d3-rof1-rof1-2*(pw*0.206 + pw*0.413)/3.1416);
    rgpulse(pw*0.413,t2,rof1,rof1);
    delay(d3-rof1-rof1-2*(pw*0.413 + pw*0.778)/3.1416);
    rgpulse(pw*0.778,t2,rof1,rof1);
    delay(d3-rof1-rof1-2*(pw*0.778 + pw*1.491)/3.1416);
    rgpulse(pw*1.491,t2,rof1,rof1);
    delay(d3-rof1-rof1-2*(pw*1.491 + pw*1.491)/3.1416);
    rgpulse(pw*1.491,t3,rof1,rof1);
    delay(d3-rof1-rof1-2*(pw*1.491 + pw*0.778)/3.1416);
    rgpulse(pw*0.778,t3,rof1,rof1);
    delay(d3-rof1-rof1-2*(pw*0.778 + pw*0.413)/3.1416);
    rgpulse(pw*0.413,t3,rof1,rof1);
    delay(d3-rof1-rof1-2*(pw*0.413 + pw*0.206)/3.1416);
    rgpulse(pw*0.206,t3,rof1,rof1);
    delay(d3-rof1-rof1-2*(pw*0.206 + pw*0.087)/3.1416);
    rgpulse(pw*0.087,t3,rof1,rof1);

/* 1st WATERGATE */

if (alt_grd[0] == 'y')
{
ifzero(v9); zgradpulse(-1.0*gzlv11,gt2);
elsenz(v9); zgradpulse(gzlv11,gt2);
endif(v9);
}
else zgradpulse(-1.0*gzlv11,gt2);
    delay(gstab-rof1);

    rgpulse(pw,t4,rof1,rof1);          /* 90d refocusing pulse, perfect echo */

if (alt_grd[0] == 'y')
{
ifzero(v9); zgradpulse(-1.0*gzlv12,gt2);
elsenz(v9); zgradpulse(gzlv12,gt2);
endif(v9);
}
else zgradpulse(-1.0*gzlv12,gt2);          /* Second WATERGATE */
    delay(gstab-rof1-rof1);

    rgpulse(pw*0.087,t5,rof1,rof1);
    delay(d3-rof1-rof1-2*(pw*0.087 + pw*0.206)/3.1416);
    rgpulse(pw*0.206,t5,rof1,rof1);
    delay(d3-rof1-rof1-2*(pw*0.206 + pw*0.413)/3.1416);
    rgpulse(pw*0.413,t5,rof1,rof1);
    delay(d3-rof1-rof1-2*(pw*0.413 + pw*0.778)/3.1416);

```

```

    rgpulse(pw*0.778,t5,rof1,rof1);
    delay(d3-rof1-rof1-2*(pw*0.778 + pw*1.491)/3.1416);
    rgpulse(pw*1.491,t5,rof1,rof1);
    delay(d3-rof1-rof1-2*(pw*1.491 + pw*1.491)/3.1416);
    rgpulse(pw*1.491,t6,rof1,rof1);
    delay(d3-rof1-rof1-2*(pw*1.491 + pw*0.778)/3.1416);
    rgpulse(pw*0.778,t6,rof1,rof1);
    delay(d3-rof1-rof1-2*(pw*0.778 + pw*0.413)/3.1416);
    rgpulse(pw*0.413,t6,rof1,rof1);
    delay(d3-rof1-rof1-2*(pw*0.413 + pw*0.206)/3.1416);
    rgpulse(pw*0.206,t6,rof1,rof1);
    delay(d3-rof1-rof1-2*(pw*0.206 + pw*0.087)/3.1416);
    rgpulse(pw*0.087,t6,rof1,rof1);

if (alt_grd[0] == 'y')
{
ifzero(v9); zgradpulse(-1.0*gzlvl2,gt2);
elsenz(v9); zgradpulse(gzlvl2,gt2);
endif(v9);
}
else zgradpulse(-1.0*gzlvl2,gt2);
    delay(gstab-rof1);

if (slock[0] == 'y') {
    rgpulse(pw*150,t4,0,0);          /* SL */
}

/* ***** 1st cycle START *****/

    delay(cycle_time*0.25-rof1-rof1);
    rgpulse(pw*2.0,zero,rof1,rof1);          /* 180d */
    delay(cycle_time*0.25-rof1-rof1);

        rgpulse(pw,t4,rof1,rof1);          /* 90d refocusing pulse */

    delay(cycle_time*0.25-rof1-rof1);
    rgpulse(pw*2.0,zero,rof1,rof1);          /* 180d */
    delay(cycle_time*0.25-rof1-rof1);

/* ***** 1st cycle END *****/

/* ***** Core cycles START *****/

starthardloop(v5);

    delay(cycle_time*0.25-rof1);
    rgpulse(pw*2.0,zero,rof1,rof1);          /* 180d */
    delay(cycle_time*0.25-rof1-rof1);

        rgpulse(pw,t4,rof1,rof1);          /* 90d refocusing pulse */

    delay(cycle_time*0.25-rof1-rof1);
    rgpulse(pw*2.0,zero,rof1,rof1);          /* 180d */
    delay(cycle_time*0.25-rof1-rof1);

endhardloop();

/* ***** Core cycles END *****/

/* ***** Last cycle START *****/

    delay(cycle_time*0.25-rof1);
    rgpulse(pw*2.0,zero,rof1,rof1);          /* 180d */
    delay(cycle_time*0.25-rof1-rof1);

        rgpulse(pw,t4,rof1,rof1);          /* 90d refocusing pulse */

    delay(cycle_time*0.25-rof1-rof1);
    rgpulse(pw*2.0,zero,rof1,rof1);          /* 180d */
    delay(cycle_time*0.25-rof1-rof1);

/* ***** Last cycle END *****/

```

```
if (slock_a[0] == 'y') {  
    obsoffset(tof+itof);  
    rgpulse(pw*250,one,rof1,rof2);  
    obsoffset(tof);}
```

```
setreceiver(t7);
```

```
status(C);
```

```
}
```

```
/* Wasted-II for Varian/Agilent spectrometers END: remove this line */
```

## Wasted-I code for Bruker spectrometers

`/* There is no warranty (implied or explicit) that it is optimal or bug-free. Anyone using this code does so at their own risk.*/`

`/* Wasated-I for Bruker spectrometers START: remove this line */`

```
;There is no warranty (implied or explicit) that it is optimal or bug-free.
;Anyone using this code does so at their own risk.

; Wasted-I: Project + Spinlock + Robust5 (no pre-focussing)
;Juan A. Aguilar. 1st draft: 20/12/2012 Durham (UK).
;Avance-version (13/05/16)

;Water suppression using Robust-5
;Broad signal suppression using Project

;Not yet published.

;Robust NMR water signal suppression for demanding analytical applications
;Juan A. Aguilar and Simon. J. Kenwright
;Analyst, 141, pp236-242 (2016)
;doi: 10.1039/C5AN02121A

;Spin echo NMR spectra without J modulation
;Juan A. Aguilar, Mathias Nilsson, Geoffrey Bodenhausen and Gareth A. Morris
;Chem. Commun., 2012,48, 811-813
;doi: 10.1039/C1CC16699A

;$CLASS=HighRes
;$DIM=1D
;$TYPE=
;$SUBTYPE=
;$COMMENT=

#include <Avance.incl>
#include <Grad.incl>
#include <Delay.incl>

"p20=p16*2"
"d19= (1/(2*cnst10))"
"p27=p1"

"d3=14*d2" ; Total T2 time

"d20=(d19*2) - (2*(p27*0.087 + p27*0.206)/3.1416) "
"d21=(d19*2) - (2*(p27*0.413 + p27*0.206)/3.1416) "
"d22=(d19*2) - (2*(p27*0.413 + p27*0.778)/3.1416) "
"d23=(d19*2) - (2*(p27*0.778 + p27*1.491)/3.1416) "
"d24=(d19*2) - (2*(p27*1.491 + p27*1.491)/3.1416) "
"d25=(d19*2) - (2*(p27*0.778 + p27*1.491)/3.1416) "
"d26=(d19*2) - (2*(p27*0.413 + p27*0.778)/3.1416) "
"d27=(d19*2) - (2*(p27*0.413 + p27*0.206)/3.1416) "
"d28=(d19*2) - (2*(p27*0.087 + p27*0.206)/3.1416) "
"acqt0=0u"

1 ze
2 30m
  d1

  p1 ph1

/***** PROJECT: START *****/

3 d2*0.25
  p1*2 ph7
  d2*0.25
```

```

p1 ph8          /* Perfect echo */

d2*0.25
p1*2 ph7
d2*0.25
lo to 3 times l4

/***** PROJECT: END *****/

p1*250 ph8 /* Spin Lock */

/***** Robust-5: START *****/

50u UNBLKGRAD
p16:gp1*EA
d16
p27*0.087 ph3
d20
p27*0.206 ph3
d21
p27*0.413 ph3
d22
p27*0.778 ph3
d23
p27*1.491 ph3
d24
p27*1.491 ph4
d25
p27*0.778 ph4
d26
p27*0.413 ph4
d27
p27*0.206 ph4
d28
p27*0.087 ph4
p16:gp1*EA
d16
50u

p1 ph2          /* Perfect echo */

50u
p16:gp2*EA
d16
p27*0.087 ph5
d20
p27*0.206 ph5
d21
p27*0.413 ph5
d22
p27*0.778 ph5
d23
p27*1.491 ph5
d24
p27*1.491 ph6
d25
p27*0.778 ph6
d26
p27*0.413 ph6
d27
p27*0.206 ph6
d28
p27*0.087 ph6
p16:gp2*EA
d16 igrad EA
50u BLKGRAD

/***** Robust-5: END *****/

go=2 ph31
30m mc #0 to 2 F0(zd)
exit

```

```

ph1=0 2
ph2=1
ph3=0 0 0 0 0 0 0 0 1 1 1 1 1 1 1 1 2 2 2 2 2 2 2 2 3 3 3 3 3 3 3
ph4=2 2 2 2 2 2 2 3 3 3 3 3 3 3 0 0 0 0 0 0 0 1 1 1 1 1 1 1 1
ph5=0 0 1 1 2 2 3 3
ph6=2 2 3 3 0 0 1 1
ph7=0 /* PROJECT 180 */
ph8=1 /* PROJECT 90 */
ph31=0 2 2 0 0 2 2 0 2 0 0 2 2 0 0 2

;pl1 : f1 channel - power level for pulse (default)
;p1 : f1 channel - 90 degree high power pulse
;p16: homospoil/gradient pulse. 1 ms
;d16: delay for homospoil/gradient recovery. 1 ms
;d1 : relaxation delay; 1-5 * T1

;d19: delay for W5 binomial water suppression. Calculated using cnst10
;cnst10: distance from nulls in Hz for W5 binomial water suppression. The further apart the
notches, the wider they become
;ns: 32 * n, total number of scans: NS * TD0. Newer use an odd number of scans or the
residual water signal will be huge.

;ds: 4;
;d2 : Cycle time (2 echo times). T2 filter time= d2*14. d2<< 0.25/(2*Pi*J).
;l4: loop for T2 filter. Min value= 1 (2 echoes). T2 filter time= d2*14 (not counting the rf
pulses)

; DO NOT SPIN THE SAMPLE

;use gradient ratio:   gp 1 :  gp 2 :  gp 3 :   gp 4
;                      62 : 10.68 :  -62 : -10.68

;for z-only gradients:
;gpz1: 62.8%
;gpz2: 10.68%
;gpz3: -62.8%
;gpz2: -10.68%

;use gradient files:
;gpnam1: SMSQ10.100
;gpnam2: SMSQ10.100
;gpnam3: SMSQ10.100
;gpnam4: SMSQ10.100

;$Id: PR,v 03 2012/01/31 17:49:32 ber Exp $

```

/\* Wasted-I for Bruker spectrometers END: remove this line \*/

# Wasted-II code for Bruker spectrometers

`/* There is no warranty (implied or explicit) that it is optimal or bug-free. Anyone using this code does so at their own risk.*/`

`/* Wasted-II for Bruker spectrometers START: remove this line */`

```
;There is no warranty (implied or explicit) that it is optimal or bug-free.
;Anyone using this code does so at their own risk.

;Robust5 - spinlock - Project - spinlock
;The first spinlock help keeping the water signals attenuated.
;The second spinlock eliminates dispersive components caused by the planar black-transfer
(recovery of signal suppressed by Robust5)
;Juan A. Aguilar. 1st draft: 20/12/2012 Durham (UK).
;Avance-version (13/05/16)

;Water suppression using Robust-5
;Broad signal suppression using Project

;Not yet published. Base on the following:

;Robust NMR water signal suppression for demanding analytical applications
;Juan A. Aguilar and Simon. J. Kenwright
;Analyst, 141, pp236-242 (2016)
;doi: 10.1039/C5AN02121A

;Spin echo NMR spectra without J modulation
;Juan A. Aguilar, Mathias Nilsson, Geoffrey Bodenhausen and Gareth A. Morris
;Chem. Commun., 2012,48, 811-813
;doi: 10.1039/C1CC16699A

;$CLASS=HighRes
;$DIM=1D
;$TYPE=
;$SUBTYPE=
;$COMMENT=

#include <Avance.incl>
#include <Grad.incl>
#include <Delay.incl>

"p20=p16*2"
"d19= (1/(2*cnst10))"
"p27=p1"

"d3=l4*d2" ; Total T2 time

"d20=(d19*2) - (2*(p27*0.087 + p27*0.206)/3.1416) "
"d21=(d19*2) - (2*(p27*0.413 + p27*0.206)/3.1416) "
"d22=(d19*2) - (2*(p27*0.413 + p27*0.778)/3.1416) "
"d23=(d19*2) - (2*(p27*0.778 + p27*1.491)/3.1416) "
"d24=(d19*2) - (2*(p27*1.491 + p27*1.491)/3.1416) "
"d25=(d19*2) - (2*(p27*0.778 + p27*1.491)/3.1416) "
"d26=(d19*2) - (2*(p27*0.413 + p27*0.778)/3.1416) "
"d27=(d19*2) - (2*(p27*0.413 + p27*0.206)/3.1416) "
"d28=(d19*2) - (2*(p27*0.087 + p27*0.206)/3.1416) "
"acqt0=0u"

1 ze
2 30m
d1
/***** Robust-5: START *****/

50u UNBLKGRAD
p20:gp3*EA
d16
```

d16  
p20:gp4\*EA  
d16  
d16  
10u

p1 ph1

4u  
p16:gp1\*EA  
d16 p118:f1  
p27\*0.087 ph3  
d20  
p27\*0.206 ph3  
d21  
p27\*0.413 ph3  
d22  
p27\*0.778 ph3  
d23  
p27\*1.491 ph3  
d24  
p27\*1.491 ph4  
d25  
p27\*0.778 ph4  
d26  
p27\*0.413 ph4  
d27  
p27\*0.206 ph4  
d28  
p27\*0.087 ph4  
p16:gp1\*EA  
d16  
4u

p1 ph2           /\* Perfect echo \*/

4u  
p16:gp2\*EA  
d16  
p27\*0.087 ph5  
d20  
p27\*0.206 ph5  
d21  
p27\*0.413 ph5  
d22  
p27\*0.778 ph5  
d23  
p27\*1.491 ph5  
d24  
p27\*1.491 ph6  
d25  
p27\*0.778 ph6  
d26  
p27\*0.413 ph6  
d27  
p27\*0.206 ph6  
d28  
p27\*0.087 ph6  
p16:gp2\*EA  
d16 igrad EA  
4u BLKGRAD

/\*\*\*\*\* Robust-5: END \*\*\*\*\*/

p1\*150 ph8   /\* Spin lock, important to keep the water signal attenuated \*/

/\*\*\*\*\* PROJECT: START \*\*\*\*\*/

3 d2\*0.25  
p1\*2 ph7  
d2\*0.25

p1 ph8           /\* Perfect echo \*/

d2\*0.25  
p1\*2 ph7  
d2\*0.25  
lo to 3 times l4



```

/***** PROJECT: END *****/

p1*250 ph8 /* Spin lock, important to suppress dispersive components */

go=2 ph31
30m mc #0 to 2 F0(zd)
exit

ph1=0 2
ph2=1
ph3=0 0 0 0 0 0 0 1 1 1 1 1 1 1 2 2 2 2 2 2 2 2 3 3 3 3 3 3 3
ph4=2 2 2 2 2 2 2 3 3 3 3 3 3 3 0 0 0 0 0 0 0 1 1 1 1 1 1 1
ph5=0 0 1 1 2 2 3 3
ph6=2 2 3 3 0 0 1 1
ph7=0 /* PROJECT 180 */
ph8=1 /* PROJECT 90 */
ph31=0 2 2 0 0 2 2 0 2 0 0 2 2 0 0 2

;pl1 : f1 channel - power level for pulse (default)
;p1 : f1 channel - 90 degree high power pulse
;p16: homospoil/gradient pulse. 1 ms
;d16: delay for homospoil/gradient recovery. 1 ms
;d1 : relaxation delay; 1-5 * T1

;d19: delay for W5 binomial water suppression. Calculated using cnst10
;cnst10: distance between nulls in Hz for W5 binomial water suppression. The further apart,
they wider they become.
;ns: 32 * n, total number of scans: NS * TD0. Newer use an odd number of scans or the
residual water signal will be huge.
;The presence of the 2nd spinlock, necessary to eliminate dispersive components, can introduce
oscillatory components in the residual water signal. Completing the 32 step phase cycle
usually eliminates the problem.

;ds: 4;
;d2 : Cycle time (2 echo times). T2 filter time= d2*14. d2<< 0.25/(2*Pi*J).
;l4: loop for T2 filter. Min value= 1 (2 echoes). T2 filter time= d2*14

; DO NOT SPIN THE SAMPLE

;use gradient ratio: gp 1 : gp 2 : gp 3 : gp 4
; 62 : 10.68 : -62 : -10.68

;for z-only gradients:
;gpz1: 62.8%
;gpz2: 10.68%
;gpz3: -62.8%
;gpz2: -10.68%

;use gradient files:
;gpnam1: SMSQ10.100
;gpnam2: SMSQ10.100
;gpnam3: SMSQ10.100
;gpnam4: SMSQ10.100
;

/* Wasted-II for Bruker spectrometers END: remove this line */

```

## Wasted-I code for Jeol spectrometers

/\* There is no warranty (implied or explicit) that it is optimal or bug-free. Anyone using this code does so at their own risk.\*/

/\* Wasted-I for Jeol spectrometers START: remove this line \*/

```
-----
--                                     --
--               Experiment Source Code   --
--          Delta NMR Experiment & Machine Control Interface --
--                                     --
--                                     --
--                                     --
-----
-- HELP.eng: Wasted-I, combination of Project + Robust-5 for solvent suppression with T2
filter
-- Category: 1D, water_suppression, liquids
-- File name : Wasted-I
-- Sequence name : Wasted-I
--
-- Reference
-- Robust NMR water signal suppression for demanding analytical applications
-- Juan A. Aguilar and Alan. J. Kenwright
-- Analyst (2016),141, 236-242
-- doi: 10.1039/C5AN02121A
--
-- Spin echo NMR spectra without J modulation
-- A Aguilar, Juan & Nilsson, Mathias & Bodenhausen, Geoffrey & A Morris, Gareth.
-- Chemical communications (2011), 48, 811-3. DOI: 10.1039/c1cc16699a.
--
--
-- END HELP

header
    filename => "Wasted-I";
    sample_id => "";
    comment  => "Wasted-I, Project+Robust-5";
    process  =  "proton.list";
    include "header";
end header;

instrument
    include "instrument";
    spin_state => "SPIN OFF";
end instrument;

acquisition
    x_domain      => "Proton";
    x_offset      => 4.68 [ppm];
    x_sweep       => 12 [ppm];
    x_points      => 16384;
    scans         => 32;
    x_prescans    => 4;
    mod_return    => 1;
    include "acquisition";
end acquisition;

pulse
    include "watergate_hard";

    collect COMPLEX,OBS;

comment_1 =? "*** Pulse ***";
x_pulse => x90, help "observe 90[deg] pulse";
x_atn   =? xatn, help "attenuator for x_pulse";

grad_1   =? 1.0 [ms], help "duration of grad_1";
grad_2   =? 1.0 [ms], help "duration of grad_2";
gradient_max => z_gradient_max, help "Maximum amplitude for a given probe as defined in
the probe file";
```

```

Note          =? "Do not exceed gradient_max value for grad_1_amp";

grad_1_amp    => 250[mT/m], help "Amplitude first gradient pair in Tesla/meter units";
grad_2_amp    => 60[mT/m], help "Amplitude second gradient pair in Tesla/meter units";
grad_shape    => "SINE",("SQUARE","SINE"), help "shape of grad_1";
grad_recover  => 1[ms], help "gradient recovery time";

    spinlock_enable => TRUE, help "use spinlock pulses flanking PROJECT";
    x_spinlock_pulse => x90_spin, help "spin lock 90 pulse width";
    x_spinlock_atn   => xatn_spin, help "attenuator of x_spinlock_pulse";
    sl2              =>64, help "SL multiplier 1";

comment_2 =? "*** T2 filter ***";
    delay_list      => 0.1[s], help "delay time(array parameter),
must be tau_step unit step";
    tau_step        => 20[ms], help "tau interval minimum time ";
    tau_interval    =? (tau_step - x_pulse * 5) / 4, help "tau_interval =(tau_step-x180)2";
    loop_number     =? round(delay_list / tau_step), help "calculation of loop number (=
round(delay_list/tau_step))";
    calc_delay      =? loop_number * tau_step, help "real delay time = loop_number *
tau_step";
    t2_addition     =? x_spinlock_pulse*(sl2), help "additional time from spin_lock
time that contributes to T1rho relaxation";

comment_312 =? "*** Watergate hard solvent suppression ***";
--watergate parameters
wgh_x_pulse    => x90, help "90[deg] pulse used for watergate composite pulse";
include "services";
xfreq          =? _get_freq( x_domain );
wgh_null       => 4000[Hz], help "null frequency";
wgh_null_ppm   =? (wgh_null/xfreq)*1000000[ppm];
wgh_tau        =? 1/wgh_null, help "wagtergate pulse interval 1/wgh_null";

comment_7 =? "*** Pulse Delay ***";
initial_wait   = 1.0[s];
relaxation_delay => 1.0[s], help "inter-pulse delay";

include "pulse";

phase_1 = {0,180};
phase_2 = {90};
    phase_3 = {0};
phase_wgh1 = {8(0), 8(90), 8(180), 8(270)};
phase_wgh2 = {2(0), 2(90), 2(180), 2(270)};
phase_acq = {0,180,180,0,0,180,180,0,180,0,0,180,180,0,0,180};

begin
    initial_wait;
    relaxation_delay;

    --Robust

-- Lock prefocussing
grad_2, (fgz.gate, fgz.shape.grad_shape, -fgz.amp.grad_1_amp);
grad_recover;
grad_2, (fgz.gate, fgz.shape.grad_shape, -fgz.amp.grad_2_amp);
grad_recover;
    grad_2, (fgz.gate, fgz.shape.grad_shape, -fgz.amp.grad_1_amp);
grad_recover;
grad_2, (fgz.gate, fgz.shape.grad_shape, -fgz.amp.grad_2_amp);
grad_recover*6;

x_pulse, (obs.gate, obs.phs.phase_1, obs.atn.x_atn);

--Project
loop loop_number times
tau_interval;
x_pulse*2, (obs.gate, obs.phs.phase_3, obs.atn.x_atn);
tau_interval;
x_pulse, (obs.gate, obs.phs.phase_2, obs.atn.x_atn);
tau_interval;
x_pulse*2, (obs.gate, obs.phs.phase_3, obs.atn.x_atn);

```

```

    tau_interval;
end loop;
--SL
when spinlock_enable do
    x_spinlock_pulse*sl2, (obs.gate, obs.phs.phase_2, obs.atn.x_spinlock_atn);
end when;

-- Perfect echo
grad_1, (fgz.gate, fgz.shape.grad_shape, fgz.amp.grad_1_amp);
grad_recover;

wgh5_comp180(wgh_x_pulse, phase_wgh1, x_atn, wgh_tau);

grad_1, (fgz.gate, fgz.shape.grad_shape, fgz.amp.grad_1_amp);
grad_recover;
x_pulse, (obs.gate, obs.phs.phase_2, obs.atn.x_atn);
grad_2, (fgz.gate, fgz.shape.grad_shape, fgz.amp.grad_2_amp);
grad_recover;

wgh5_comp180(wgh_x_pulse, phase_wgh2, x_atn, wgh_tau);

grad_2, (fgz.gate, fgz.shape.grad_shape, fgz.amp.grad_2_amp);
grad_recover;

acq (dead_time, delay, phase_acq);
end pulse;

```

/\* Wasted-I for Jeol spectrometers END: remove this line \*/

## Wasted-II code for Jeol spectrometers

/\* There is no warranty (implied or explicit) that it is optimal or bug-free. Anyone using this code does so at their own risk.\*/

/\* Wasted-II for Jeol spectrometers START: remove this line \*/

```
-----
--                                     --
--               Experiment Source Code   --
--      Delta NMR Experiment & Machine Control Interface  --
--                                     --
--                                     --
--                                     --
--                                     --
-----
-- HELP.eng: Wasted-II, combination of Robust-5 + Project for solvent suppression with T2
filter
-- Category: 1D, water_suppression, liquids
-- File name : Wasted-II
-- Sequence name : Wasted-II
--
-- Reference
-- Robust NMR water signal suppression for demanding analytical applications
-- Juan A. Aguilar and Alan. J. Kenwright
-- Analyst (2016),141, 236-242
-- doi: 10.1039/C5AN02121A
--
-- Spin echo NMR spectra without J modulation
-- A Aguilar, Juan & Nilsson, Mathias & Bodenhausen,
--
-- END HELP

header
    filename => "Wasted-II";
    sample_id => "";
    comment  => " Wasted-II, Robust-5 + Project";
    process  = "proton.list";
    include "header";
end header;

instrument
    include "instrument";
    spin_state => "SPIN OFF";
end instrument;

acquisition
    x_domain      => "Proton";
    x_offset      => 4.68[ppm];
    x_sweep       => 12[ppm];
    x_points      => 16384;
    scans         => 32;
    x_prescans    => 4;
    mod_return    => 1;
    include "acquisition";
end acquisition;

pulse
    include "watergate_hard";

    collect COMPLEX,OBS;

comment_1 =? "*** Pulse ***";
x_pulse => x90, help "observe 90[deg] pulse";
x_atn   =? xatn, help "attenuator for x_pulse";

grad_1   =? 1.0[ms], help "duration of grad_1";
grad_2   =? 1.0[ms], help "duration of grad_2";
gradient_max => z_gradient_max, help "Maximum amplitude for a given probe as defined in
the probe file";
Note     =? "Do not exceed gradient_max value for grad_1_amp";
```

```

grad_1_amp => 250[mT/m], help "Amplitude first gradient pair in Tesla/meter units";
grad_2_amp => 60[mT/m], help "Amplitude second gradient pair in Tesla/meter units";
grad_shape => "SINE",("SQUARE","SINE"), help "shape of grad_1";
grad_recover => 1[ms], help "gradient recovery time";

spinlock_enable => TRUE, help "use spinlock pulses flanking PROJECT";
x_spinlock_pulse => x90_spin, help "spin lock 90 pulse width";
x_spinlock_atn => xatn_spin, help "attenuator of x_spinlock_pulse";
sl1 =>128, help "SL multiplier 1";
sl2 =>64, help "SL multiplier 2";

comment_2 =? "*** T2 filter ***";
delay_list => 0.1[s], help "delay time(array parameter),
must be tau_step unit step";
tau_step => 20[ms], help "tau interval minimum time ";
tau_interval =? (tau_step - x_pulse * 5) / 4, help "tau_interval =(tau_step-x180)2)";
loop_number =? round(delay_list / tau_step), help "calculation of loop number (=
round(delay_list/tau_step))";
calc_delay =? loop_number * tau_step, help "real delay time = loop_number *
tau_step";
t2_addition =? x_spinlock_pulse*(sl1+sl2), help "additional time from
spin_lock time that contributes to T1rho relaxation";

comment_312 =? "*** Watergate hard solvent suppression ***";
--watergate parameters
wgh_x_pulse => x90, help "90[deg] pulse used for watergate composite pulse";
include "services";
xfreq =? _get_freq( x_domain );
wgh_null => 4000[Hz], help "null frequency";
wgh_null_ppm =? (wgh_null/xfreq)*1000000[ppm];
wgh_tau =? 1/wgh_null, help "watergate pulse interval 1/wgh_null";

comment_7 =? "*** Pulse Delay ***";
initial_wait = 1.0[s];
relaxation_delay => 1.0[s], help "inter-pulse delay";

include "pulse";

phase_1 = {0,180};
phase_2 = {90};
phase_3 = {0};
phase_wgh1 = {8(0), 8(90), 8(180), 8(270)};
phase_wgh2 = {2(0), 2(90), 2(180), 2(270)};
phase_acq = {0,180,180,0,0,180,180,0,180,0,0,180,180,0,0,180};

begin
initial_wait;
relaxation_delay;

--Robust

-- Lock prefocussing
grad_2, (fgz.gate, fgz.shape.grad_shape, -fgz.amp.grad_1_amp);
grad_recover;
grad_2, (fgz.gate, fgz.shape.grad_shape, -fgz.amp.grad_2_amp);
grad_recover;
grad_2, (fgz.gate, fgz.shape.grad_shape, -fgz.amp.grad_1_amp);
grad_recover;
grad_2, (fgz.gate, fgz.shape.grad_shape, -fgz.amp.grad_2_amp);
grad_recover*6;

-- Perfect echo
x_pulse, (obs.gate, obs.phs.phase_1, obs.atn.x_atn);
grad_1, (fgz.gate, fgz.shape.grad_shape, fgz.amp.grad_1_amp);
grad_recover;

wgh5_comp180(wgh_x_pulse, phase_wgh1, x_atn, wgh_tau);

grad_1, (fgz.gate, fgz.shape.grad_shape, fgz.amp.grad_1_amp);
grad_recover;
x_pulse, (obs.gate, obs.phs.phase_2, obs.atn.x_atn);
grad_2, (fgz.gate, fgz.shape.grad_shape, fgz.amp.grad_2_amp);
grad_recover;

```

```

wgh5_comp180(wgh_x_pulse, phase_wgh2, x_atn, wgh_tau);

grad_2, (fgz.gate, fgz.shape.grad_shape, fgz.amp.grad_2_amp);
grad_recover;

--SL
when spinlock_enable do
    x_spinlock_pulse*s11, (obs.gate, obs.phs.phase_2, obs.atn.x_spinlock_atn);
end when;

--Project
loop loop_number times
    tau_interval;
    x_pulse*2, (obs.gate, obs.phs.phase_3, obs.atn.x_atn);
    tau_interval;
    x_pulse, (obs.gate, obs.phs.phase_2, obs.atn.x_atn);
    tau_interval;
    x_pulse*2, (obs.gate, obs.phs.phase_3, obs.atn.x_atn);
    tau_interval;
end loop;
--SL
when spinlock_enable do
    x_spinlock_pulse*s12, (obs.gate, obs.phs.phase_2, obs.atn.x_spinlock_atn);
end when;

acq (dead_time, delay, phase_acq);
end pulse;

```

/\* Wasted-II for Jeol spectrometers END: remove this line \*/
